# Supplementary material for: Early life sleep disruption potentiates lasting sex-specific changes in behavior in genetically vulnerable Shank3 heterozygous autism model mice
Source: PubMed Central journal article supplement (PMC9425965; doi:10.1186/s13229-022-00514-5), 2022-08-29
Supplement: 13229_2022_514_MOESM1_ESM.pdf [file 13229_2022_514_MOESM1_ESM.pdf]

Juvenile male sleep data

| Light sleep amount | Mean          | SEM | ANOVA    | SS      | DF | MS    | F (DFn) | DFd)         | P value   | Tukey's test | Mean Diff. | 95.00% CI of diff. | Adjusted P Value | Summary |
|--------------------|---------------|-----|----------|---------|----|-------|---------|--------------|-----------|--------------|------------|--------------------|------------------|---------|
| WT                 | 61.55 ± 0.963 |     | Genotype | 117.7   | 2  | 58.84 | F (2    | 42) = 5.516  | P=0.0075  | WT vs. HET   | -0.2215    | -2.962 to 2.519    | 0.979            | ns      |
| HET                | 61.77 ± 0.656 |     | Residual | 448     | 42 | 10.67 |         |              |           | WT vs. HOM   | 3.633      | 0.4828 to 6.782    | 0.0205           | *       |
| HOM                | 57.91 ± 0.983 |     | Total    | 565.7   | 44 |       |         |              |           | HET vs. HOM  | 3.854      | 0.8479 to 6.860    | 0.0091           | **      |
| Dark sleep amount  | Mean          | SEM | ANOVA    | SS      | DF | MS    | F (DFn) | DFd)         | P value   | Tukey's test | Mean Diff. | 95.00% CI of diff. | Adjusted P Value | Summary |
| WT                 | 23.23 ± 1.093 |     | Genotype | 172.2   | 2  | 86.11 | F (2    | 42) = 5.924  | P=0.0054  | WT vs. HET   | 0.9953     | -2.204 to 4.195    | 0.7318           | ns      |
| HET                | 22.23 ± 0.849 |     | Residual | 610.5   | 42 | 14.54 |         |              |           | WT vs. HOM   | 4.997      | 1.320 to 8.674     | 0.0055           | **      |
| HOM                | 18.23 ± 1.013 |     | Total    | 782.7   | 44 |       |         |              |           | HET vs. HOM  | 4.002      | 0.4925 to 7.511    | 0.0222           | *       |
| Daily sleep amount | Mean          | SEM | ANOVA    | SS      | DF | MS    | F (DFn) | DFd)         | P value   | Tukey's test | Mean Diff. | 95.00% CI of diff. | Adjusted P Value | Summary |
| WT                 | 42.39 ± 0.506 |     | Genotype | 140.9   | 2  | 70.3  | F (2    | 42) = 23.48  | P=<0.0001 | WT vs. HET   | 0.3869     | -1.066 to 1.840    | 0.7952           | ns      |
| HET                | 42 ± 0.434    |     | Residual | 126     | 42 | 3     |         |              |           | WT vs. HOM   | 4.315      | 2.645 to 5.985     | <0.0001          | ****    |
| HOM                | 38.07 ± 0.266 |     | Total    | 266.9   | 44 |       |         |              |           | HET vs. HOM  | 3.928      | 2.334 to 5.522     | <0.0001          | ****    |
| Light sleep bouts  | Mean          | SEM | ANOVA    | SS      | DF | MS    | F (DFn) | DFd)         | P value   | Tukey's test | Mean Diff. | 95.00% CI of diff. | Adjusted P Value | Summary |
| WT                 | 13.34 ± 0.613 |     | Genotype | 55153   | 2  | 27577 | F (2    | 42) = 0.8445 | P=0.4369  | WT vs. HET   | n/a        |                    |                  |         |
| HET                | 14.12 ± 0.784 |     | Residual | 1371477 | 42 | 32654 |         |              |           | WT vs. HOM   |            |                    |                  |         |
| HOM                | 12.67 ± 0.912 |     | Total    | 1426630 | 44 |       |         |              |           | HET vs. HOM  |            |                    |                  |         |
| Dark sleep bouts   | Mean          | SEM | ANOVA    | SS      | DF | MS    | F (DFn) | DFd)         | P value   | Tukey's test | Mean Diff. | 95.00% CI of diff. | Adjusted P Value | Summary |
| WT                 | 6.535 ± 0.413 |     | Genotype | 104032  | 2  | 52016 | F (2    | 42) = 3.177  | P=0.0519  | WT vs. HET   | -78.49     | -185.9 to 28.88    | 0.19             | ns      |
| HET                | 7.843 ± 0.643 |     | Residual | 687635  | 42 | 16372 |         |              |           | WT vs. HOM   | 35.53      | -87.87 to 158.9    | 0.7651           | ns      |
| HOM                | 5.943 ± 0.356 |     | Total    | 791667  | 44 |       |         |              |           | HET vs. HOM  | 114        | -3.755 to 231.8    | 0.0595           | ns      |

Juvenile female sleep data

| Light sleep amount | Mean          | SEM | ANOVA    | SS      | DF | MS     | F (DFn) | DFd)        | P value  | Tukey's test | Mean Diff. | 95.00% CI of diff. | Adjusted P Value | Summary |
|--------------------|---------------|-----|----------|---------|----|--------|---------|-------------|----------|--------------|------------|--------------------|------------------|---------|
| WT                 | 59.28 ± 0.798 |     | Genotype | 111.2   | 2  | 55.59  | F (2    | 45) = 4.238 | P=0.0206 | WT vs. HET   | 0.07865    | -2.741 to 2.898    | 0.9975           | ns      |
| HET                | 59.2 ± 0.825  |     | Residual | 590.4   | 45 | 13.12  |         |             |          | WT vs. HOM   | 3.941      | 0.3569 to 7.524    | 0.0282           | *       |
| HOM                | 55.34 ± 1.235 |     | Total    | 701.5   | 47 |        |         |             |          | HET vs. HOM  | 3.862      | 0.3647 to 7.359    | 0.0274           | *       |
| Dark sleep amount  | Mean          | SEM | ANOVA    | SS      | DF | MS     | F (DFn) | DFd)        | P value  | Tukey's test | Mean Diff. | 95.00% CI of diff. | Adjusted P Value | Summary |
| WT                 | 22.16 ± 0.945 |     | Genotype | 95.98   | 2  | 47.99  | F (2    | 45) = 4.341 | P=0.0189 | WT vs. HET   | 0.221      | -2.367 to 2.809    | 0.9767           | ns      |
| HET                | 21.94 ± 0.627 |     | Residual | 497.5   | 45 | 11.05  |         |             |          | WT vs. HOM   | 3.733      | 0.4432 to 7.023    | 0.0228           | *       |
| HOM                | 18.42 ± 0.906 |     | Total    | 593.5   | 47 |        |         |             |          | HET vs. HOM  | 3.512      | 0.3015 to 6.722    | 0.0292           | *       |
| Daily sleep amount | Mean          | SEM | ANOVA    | SS      | DF | MS     | F (DFn) | DFd)        | P value  | Tukey's test | Mean Diff. | 95.00% CI of diff. | Adjusted P Value | Summary |
| WT                 | 40.72 ± 0.377 |     | Genotype | 103.4   | 2  | 51.69  | F (2    | 45) = 10.25 | P=0.0002 | WT vs. HET   | 0.1498     | -1.599 to 1.898    | 0.9765           | ns      |
| HET                | 40.57 ± 0.535 |     | Residual | 227     | 45 | 5.044  |         |             |          | WT vs. HOM   | 3.837      | 1.615 to 6.059     | 0.0004           | ***     |
| HOM                | 36.88 ± 0.939 |     | Total    | 330.4   | 47 |        |         |             |          | HET vs. HOM  | 3.687      | 1.518 to 5.856     | 0.0005           | ***     |
| Light sleep bouts  | Mean          | SEM | ANOVA    | SS      | DF | MS     | F (DFn) | DFd)        | P value  | Tukey's test | Mean Diff. | 95.00% CI of diff. | Adjusted P Value | Summary |
| WT                 | 12.25 ± 0.662 |     | Genotype | 250397  | 2  | 125199 | F (2    | 45) = 4.512 | P=0.0164 | WT vs. HET   | -59.71     | -189.4 to 69.97    | 0.5094           | ns      |
| HET                | 13.24 ± 0.639 |     | Residual | 1248782 | 45 | 27751  |         |             |          | WT vs. HOM   | 139.7      | -25.17 to 304.5    | 0.1113           | ns      |
| HOM                | 9.921 ± 0.756 |     | Total    | 1499179 | 47 |        |         |             |          | HET vs. HOM  | 199.4      | 38.51 to 360.2     | 0.0119           | *       |
| Dark sleep bouts   | Mean          | SEM | ANOVA    | SS      | DF | MS     | F (DFn) | DFd)        | P value  | Tukey's test | Mean Diff. | 95.00% CI of diff. | Adjusted P Value | Summary |
| WT                 | 6.732 ± 0.602 |     | Genotype | 69545   | 2  | 34772  | F (2    | 45) = 1.528 | P=0.2281 | WT vs. HET   | n/a        |                    |                  |         |
| HET                | 7.654 ± 0.596 |     | Residual | 1024340 | 45 | 22763  |         |             |          | WT vs. HOM   |            |                    |                  |         |
| HOM                | 5.998 ± 0.581 |     | Total    | 1093885 | 47 |        |         |             |          | HET vs. HOM  |            |                    |                  |         |

Adolescent male sleep data

| Light sleep amount | Mean          | SEM | ANOVA    | SS     | DF | MS    | F (DFn) | DFd)        | P value  | Tukey's test | Mean Diff. | 95.00% CI of diff. | Adjusted P Value | Summary |
|--------------------|---------------|-----|----------|--------|----|-------|---------|-------------|----------|--------------|------------|--------------------|------------------|---------|
| WT                 | 61.87 ± 0.962 |     | Genotype | 74.29  | 2  | 37.15 | F (2    | 39) = 2.410 | P=0.1031 | WT vs. HET   | n/a        |                    |                  |         |
| HET                | 59.48 ± 0.962 |     | Residual | 601.1  | 39 | 15.41 |         |             |          | WT vs. HOM   |            |                    |                  |         |
| HOM                | 58.53 ± 1.219 |     | Total    | 675.4  | 41 |       |         |             |          | HET vs. HOM  |            |                    |                  |         |
| Dark sleep amount  | Mean          | SEM | ANOVA    | SS     | DF | MS    | F (DFn) | DFd)        | P value  | Tukey's test | Mean Diff. | 95.00% CI of diff. | Adjusted P Value | Summary |
| WT                 | 24.45 ± 0.92  |     | Genotype | 237.7  | 2  | 118.9 | F (2    | 39) = 4.145 | P=0.0233 | WT vs. HET   | -2.909     | -7.336 to 1.518    | 0.2573           | ns      |
| HET                | 27.36 ± 1.373 |     | Residual | 1118   | 39 | 28.68 |         |             |          | WT vs. HOM   | 3.727      | -2.185 to 9.640    | 0.2856           | ns      |
| HOM                | 20.72 ± 2.537 |     | Total    | 1356   | 41 |       |         |             |          | HET vs. HOM  | 6.636      | 0.8676 to 12.40    | 0.021            | *       |
| Daily sleep amount | Mean          | SEM | ANOVA    | SS     | DF | MS    | F (DFn) | DFd)        | P value  | Tukey's test | Mean Diff. | 95.00% CI of diff. | Adjusted P Value | Summary |
| WT                 | 43.16 ± 0.433 |     | Genotype | 79.44  | 2  | 39.72 | F (2    | 39) = 8.777 | P=0.0007 | WT vs. HET   | -0.2568    | -2.015 to 1.502    | 0.9327           | ns      |
| HET                | 43.42 ± 0.485 |     | Residual | 176.5  | 39 | 4.525 |         |             |          | WT vs. HOM   | 3.538      | 1.189 to 5.886     | 0.0021           | **      |
| HOM                | 39.62 ± 1.103 |     | Total    | 255.9  | 41 |       |         |             |          | HET vs. HOM  | 3.794      | 1.503 to 6.086     | 0.0007           | ***     |
| Light sleep bouts  | Mean          | SEM | ANOVA    | SS     | DF | MS    | F (DFn) | DFd)        | P value  | Tukey's test | Mean Diff. | 95.00% CI of diff. | Adjusted P Value | Summary |
| WT                 | 12.25 ± 0.772 |     | Genotype | 142057 | 2  | 71029 | F (2    | 39) = 3.277 | P=0.0484 | WT vs. HET   | 88.44      | -33.27 to 210.2    | 0.1929           | ns      |
| HET                | 10.78 ± 0.49  |     | Residual | 845436 | 39 | 21678 |         |             |          | WT vs. HOM   | 160.7      | -1.819 to 323.3    | 0.0532           | ns      |
| HOM                | 9.574 ± 0.48  |     | Total    | 987493 | 41 |       |         |             |          | HET vs. HOM  | 72.3       | -86.30 to 230.9    | 0.5134           | ns      |
| Dark sleep bouts   | Mean          | SEM | ANOVA    | SS     | DF | MS    | F (DFn) | DFd)        | P value  | Tukey's test | Mean Diff. | 95.00% CI of diff. | Adjusted P Value | Summary |
| WT                 | 6.565 ± 0.554 |     | Genotype | 79073  | 2  | 39537 | F (2    | 39) = 4.481 | P=0.0177 | WT vs. HET   | 65.53      | -12.12 to 143.2    | 0.1125           | ns      |
| HET                | 5.473 ± 0.225 |     | Residual | 344105 | 39 | 8823  |         |             |          | WT vs. HOM   | 120.2      | 16.50 to 223.9     | 0.0199           | *       |
| HOM                | 4.562 ± 0.326 |     | Total    | 423178 | 41 |       |         |             |          | HET vs. HOM  | 54.68      | -46.51 to 155.9    | 0.3947           | ns      |

Adolescent female sleep data

| Light sleep amount | Mean          | SEM | ANOVA    | SS     | DF | MS    | F (DFn) | DFd)        | P value  | Tukey's test | Mean Diff. | 95.00% CI of diff. | Adjusted P Value | Summary |
|--------------------|---------------|-----|----------|--------|----|-------|---------|-------------|----------|--------------|------------|--------------------|------------------|---------|
| WT                 | 58.8 ± 1.004  |     | Genotype | 107.6  | 2  | 53.82 | F (2    | 30) = 3.816 | P=0.0334 | WT vs. HET   | 3.016      | -0.6907 to 6.722   | 0.1282           | ns      |
| HET                | 55.79 ± 1.354 |     | Residual | 423.1  | 30 | 14.1  |         |             |          | WT vs. HOM   | 4.345      | 0.1849 to 8.506    | 0.0392           | *       |
| HOM                | 54.46 ± 0.651 |     | Total    | 530.8  | 32 |       |         |             |          | HET vs. HOM  | 1.33       | -2.896 to 5.555    | 0.7206           | ns      |
| Dark sleep amount  | Mean          | SEM | ANOVA    | SS     | DF | MS    | F (DFn) | DFd)        | P value  | Tukey's test | Mean Diff. | 95.00% CI of diff. | Adjusted P Value | Summary |
| WT                 | 22.46 ± 0.927 |     | Genotype | 103.7  | 2  | 51.85 | F (2    | 30) = 2.991 | P=0.0654 | WT vs. HET   | -2.06      | -6.169 to 2.049    | 0.4419           | ns      |
| HET                | 24.52 ± 1.434 |     | Residual | 520    | 30 | 17.33 |         |             |          | WT vs. HOM   | 2.581      | -2.031 to 7.193    | 0.3641           | ns      |
| HOM                | 19.88 ± 1.43  |     | Total    | 623.7  | 32 |       |         |             |          | HET vs. HOM  | 4.641      | -0.04413 to 9.326  | 0.0526           | ns      |
| Daily sleep amount | Mean          | SEM | ANOVA    | SS     | DF | MS    | F (DFn) | DFd)        | P value  | Tukey's test | Mean Diff. | 95.00% CI of diff. | Adjusted P Value | Summary |
| WT                 | 40.63 ± 0.527 |     | Genotype | 64.8   | 2  | 32.4  | F (2    | 30) = 5.564 | P=0.0088 | WT vs. HET   | 0.478      | -1.904 to 2.859    | 0.8743           | ns      |
| HET                | 40.15 ± 0.86  |     | Residual | 174.7  | 30 | 5.823 |         |             |          | WT vs. HOM   | 3.463      | 0.7899 to 6.136    | 0.009            | **      |
| HOM                | 37.17 ± 0.777 |     | Total    | 239.5  | 32 |       |         |             |          | HET vs. HOM  | 2.985      | 0.2698 to 5.701    | 0.0288           | *       |
| Light sleep bouts  | Mean          | SEM | ANOVA    | SS     | DF | MS    | F (DFn) | DFd)        | P value  | Tukey's test | Mean Diff. | 95.00% CI of diff. | Adjusted P Value | Summary |
| WT                 | 11.83 ± 0.628 |     | Genotype | 183787 | 2  | 91894 | F (2    | 30) = 5.810 | P=0.0074 | WT vs. HET   | 61.59      | -62.53 to 185.7    | 0.449            | ns      |
| HET                | 10.81 ± 0.664 |     | Residual | 474502 | 30 | 15817 |         |             |          | WT vs. HOM   | 192.1      | 52.78 to 331.4     | 0.0053           | **      |
| HOM                | 8.632 ± 0.463 |     | Total    | 658289 | 32 |       |         |             |          | HET vs. HOM  | 130.5      | -11.00 to 272.0    | 0.0752           | ns      |
| Dark sleep bouts   | Mean          | SEM | ANOVA    | SS     | DF | MS    | F (DFn) | DFd)        | P value  | Tukey's test | Mean Diff. | 95.00% CI of diff. | Adjusted P Value | Summary |
| WT                 | 7.379 ± 0.729 |     | Genotype | 119325 | 2  | 59663 | F (2    | 30) = 4.071 | P=0.0273 | WT vs. HET   | 44.65      | -74.82 to 164.1    | 0.6312           | ns      |
| HET                | 6.635 ± 0.394 |     | Residual | 439672 | 30 | 14656 |         |             |          | WT vs. HOM   | 154.2      | 20.12 to 288.3     | 0.0215           | *       |
| HOM                | 4.809 ± 0.578 |     | Total    | 558997 | 32 |       |         |             |          | HET vs. HOM  | 109.6      | -26.64 to 245.8    | 0.1338           | ns      |
