# Supplementary material for: Early life sleep disruption potentiates lasting sex-specific changes in behavior in genetically vulnerable Shank3 heterozygous autism model mice
Source: PubMed Central journal article supplement (PMC9425965; doi:10.1186/s13229-022-00514-5), 2022-08-29
Supplement: 13229_2022_514_MOESM2_ESM.pdf [file 13229_2022_514_MOESM2_ESM.pdf]

**Elevated plus maze**

|                                  | Means ± SEM  |              | Unpaired t-test with Holm-Sidak correction |    |          |
|----------------------------------|--------------|--------------|--------------------------------------------|----|----------|
|                                  | WT           | HET          | t ratio                                    | df | p value  |
| <i>Percent time in open arms</i> |              |              |                                            |    |          |
| Control males                    | 25.91 ± 4.78 | 26.31 ± 3.12 | 0.06472                                    | 17 | 0.964152 |
| ELSD males                       | 24.98 ± 4.98 | 23.19 ± 5.37 | 0.2429                                     | 19 | 0.964152 |
| PASD males                       | 33.40 ± 6.84 | 38.49 ± 2.86 | 0.6866                                     | 14 | 0.877635 |
| Control females                  | 17.69 ± 1.94 | 22.49 ± 6.21 | 0.8093                                     | 16 | 0.43021  |
| ** ELSD females                  | 23.83 ± 2.75 | 36.56 ± 2.13 | 3.51                                       | 16 | 0.008685 |
| # PASD females                   | 32.75 ± 4.40 | 46.10 ± 4.40 | 2.148                                      | 22 | 0.084182 |

|                                   | Means ± SEM  |              | Unpaired t-test with Holm-Sidak correction |    |          |
|-----------------------------------|--------------|--------------|--------------------------------------------|----|----------|
|                                   | WT           | HET          | t ratio                                    | df | p value  |
| <i>Percent open arm entrances</i> |              |              |                                            |    |          |
| Control males                     | 36.04 ± 3.47 | 34.51 ± 2.28 | 0.3363                                     | 17 | 0.766385 |
| ELSD males                        | 32.95 ± 2.40 | 30.21 ± 2.94 | 0.7133                                     | 19 | 0.766385 |
| PASD males                        | 37.13 ± 5.02 | 41.75 ± 1.13 | 0.8985                                     | 14 | 0.766385 |
| Control females                   | 31.08 ± 3.31 | 31.61 ± 1.77 | 0.1317                                     | 16 | 0.896834 |
| ** ELSD females                   | 34.55 ± 2.41 | 43.38 ± 2.41 | 2.557                                      | 16 | 0.061947 |
| PASD females                      | 37.20 ± 2.93 | 42.44 ± 2.87 | 1.28                                       | 22 | 0.38217  |

**Open field test**

|                                     | Means ± SEM      |                  | Unpaired t-test with Holm-Sidak correction |    |          |
|-------------------------------------|------------------|------------------|--------------------------------------------|----|----------|
|                                     | WT               | HET              | t ratio                                    | df | p value  |
| <i>Total distance traveled (cm)</i> |                  |                  |                                            |    |          |
| Control males                       | 6117.64 ± 519.83 | 6812.57 ± 407.81 | 0.9489                                     | 16 | 0.356784 |
| ** ELSD males                       | 7675.30 ± 687.29 | 5211.27 ± 478.36 | 2.988                                      | 19 | 0.022514 |
| PASD males                          | 7402.25 ± 584.49 | 6329.25 ± 167.60 | 1.765                                      | 14 | 0.188948 |
| Control females                     | 5804.90 ± 505.58 | 6679.00 ± 458.05 | 1.25                                       | 16 | 0.405805 |
| ELSD females                        | 6831.00 ± 846.82 | 6798.75 ± 530.14 | 0.03132                                    | 15 | 0.975429 |
| PASD females                        | 8946.58 ± 845.93 | 6863.42 ± 480.23 | 2.142                                      | 22 | 0.125066 |

**Prepulse inhibition**

|                                   | Means ± SEM |               | 2-way ANOVA   |             |             |                           | Sidak's multiple comparisons test |                  |
|-----------------------------------|-------------|---------------|---------------|-------------|-------------|---------------------------|-----------------------------------|------------------|
|                                   | WT          | HET           | Factor        | % variation | F(DFn, DFd) | p value                   | dB                                | Adjusted p value |
| <i>Percent startle inhibition</i> |             |               |               |             |             |                           |                                   |                  |
| <b>Control males</b>              |             |               |               |             |             |                           |                                   |                  |
| <i>Startle tone (dB)</i>          | 74          | 12.27 ± 11.57 | 13.05 ± 6.73  | dB x gtype  | 0.2831      | F (4, 68) = 0.2549        | 0.9057                            |                  |
|                                   | 78          | 55.21 ± 3.30  | 48.98 ± 4.62  | dB trial    | 65.31       | F (1, 569, 26.67) = 58.81 | <0.0001                           |                  |
|                                   | 82          | 65.48 ± 3.92  | 66.49 ± 3.60  | genotype    | 0.2335      | F (1, 17) = 0.3079        | 0.5862                            |                  |
|                                   | 86          | 76.72 ± 3.58  | 72.65 ± 3.66  | subject     | 12.9        | F (17, 68) = 2.733        | 0.0018                            |                  |
|                                   | 90          | 81.45 ± 2.93  | 75.70 ± 3.05  |             |             |                           |                                   |                  |
| <b>ELSD males</b>                 |             |               |               |             |             |                           |                                   |                  |
|                                   | 74          | 28.69 ± 5.09  | 18.16 ± 9.87  | dB x gtype  | 0.2965      | F (4, 76) = 0.4587        | 0.7658                            | 74 0.8913        |
|                                   | 78          | 65.11 ± 3.87  | 46.78 ± 8.62  | dB trial    | 51.84       | F (2, 234, 42.44) = 80.18 | <0.0001                           | 78 0.3159        |
|                                   | 82          | 78.92 ± 2.75  | 59.67 ± 6.59  | genotype    | 8.412       | F (1, 19) = 5.847         | 0.0258                            | 82 0.0869        |
|                                   | *86         | 84.00 ± 2.70  | 67.71 ± 3.89  | subject     | 27.34       | F (19, 76) = 8.902        | <0.0001                           | 86 0.015         |
|                                   | **90        | 86.19 ± 1.26  | 69.75 ± 3.98  |             |             |                           |                                   | 90 0.0099        |
| <b>PASD males</b>                 |             |               |               |             |             |                           |                                   |                  |
|                                   | 74          | 22.40 ± 7.47  | 25.41 ± 10.32 | dB x gtype  | 2.183       | F (4, 56) = 2.374         | 0.063                             |                  |
|                                   | 78          | 42.78 ± 8.39  | 66.73 ± 6.99  | dB trial    | 47.33       | F (1, 909, 26.72) = 51.48 | <0.0001                           |                  |
|                                   | 82          | 63.65 ± 8.94  | 73.04 ± 5.32  | genotype    | 2.788       | F (1, 14) = 1.121         | 0.3077                            |                  |
|                                   | 86          | 67.36 ± 7.45  | 77.08 ± 5.23  | subject     | 34.83       | F (14, 56) = 10.82        | <0.0001                           |                  |
|                                   | 90          | 76.48 ± 5.87  | 76.74 ± 4.15  |             |             |                           |                                   |                  |
| <b>Control females</b>            |             |               |               |             |             |                           |                                   |                  |
|                                   | 74          | 25.86 ± 7.56  | 28.38 ± 5.30  | dB x gtype  | 1.26        | F (4, 64) = 1.107         | 0.3609                            |                  |
|                                   | 78          | 62.79 ± 3.91  | 52.80 ± 6.68  | dB trial    | 53.81       | F (2, 093, 33.48) = 47.29 | <0.0001                           |                  |
|                                   | 82          | 68.70 ± 3.54  | 57.49 ± 5.99  | genotype    | 1.74        | F (1, 16) = 1.209         | 0.2879                            |                  |
|                                   | 86          | 71.20 ± 3.64  | 67.46 ± 3.28  | subject     | 23.03       | F (16, 64) = 5.060        | <0.0001                           |                  |
|                                   | 90          | 74.65 ± 3.01  | 68.21 ± 4.64  |             |             |                           |                                   |                  |
| <b>ELSD females</b>               |             |               |               |             |             |                           |                                   |                  |
|                                   | 74          | 30.28 ± 10.84 | 11.98 ± 9.72  | dB x gtype  | 1.577       | F (4, 64) = 1.896         | 0.122                             |                  |
|                                   | 78          | 59.81 ± 6.21  | 60.11 ± 5.13  | dB trial    | 51.54       | F (1, 553, 24.85) = 61.94 | <0.0001                           |                  |
|                                   | 82          | 66.80 ± 6.62  | 67.88 ± 5.80  | genotype    | 0.7215      | F (1, 16) = 0.3407        | 0.5676                            |                  |
|                                   | 86          | 78.05 ± 3.90  | 72.46 ± 6.42  | subject     | 33.88       | F (16, 64) = 10.18        | <0.0001                           |                  |
|                                   | 90          | 77.42 ± 4.73  | 75.84 ± 5.05  |             |             |                           |                                   |                  |
| <b>PASD females</b>               |             |               |               |             |             |                           |                                   |                  |
|                                   | 74          | 41.56 ± 8.21  | 11.48 ± 6.32  | dB x gtype  | 3.45        | F (4, 88) = 4.895         | 0.0013                            | 74 0.0423        |
|                                   | 78          | 64.63 ± 3.36  | 59.28 ± 3.20  | dB trial    | 59.59       | F (1, 363, 29.98) = 84.56 | <0.0001                           | 78 0.7797        |
|                                   | 82          | 73.93 ± 3.15  | 65.39 ± 3.47  | genotype    | 5.679       | F (1, 22) = 7.916         | 0.0101                            | 82 0.3489        |
|                                   | 86          | 80.34 ± 1.70  | 72.93 ± 3.14  | subject     | 15.78       | F (22, 88) = 4.072        | <0.0001                           | 86 0.2393        |
|                                   | 90          | 83.07 ± 1.88  | 75.45 ± 2.69  |             |             |                           |                                   | 90 0.1472        |

## Sociability

*Seconds in proximity* Means ± SEM

|                        |     | <b>non-social</b> | <b>stranger 1</b> |
|------------------------|-----|-------------------|-------------------|
| <b>Control males</b>   | WT  | 75.17 ± 8.25      | 145.26 ± 18.84    |
|                        | HET | 81.18 ± 8.68      | 161.48 ± 24.76    |
| <b>ELSD males</b>      | WT  | 78.54 ± 7.35      | 157.93 ± 12.21    |
|                        | HET | 92.20 ± 5.54      | 117.01 ± 11.81    |
| <b>PASD males</b>      | WT  | 71.30 ± 5.61      | 158.71 ± 11.65    |
|                        | HET | 68.65 ± 6.41      | 144.16 ± 7.28     |
| <b>Control females</b> | WT  | 72.93 ± 7.83      | 152.36 ± 15.69    |
|                        | HET | 75.69 ± 7.29      | 147.53 ± 6.10     |
| <b>ELSD females</b>    | WT  | 80.74 ± 6.40      | 168.75 ± 19.48    |
|                        | HET | 99.78 ± 15.06     | 182.89 ± 17.83    |
| <b>PASD females</b>    | WT  | 73.63 ± 7.00      | 111.64 ± 10.06    |
|                        | HET | 76.98 ± 6.84      | 132.80 ± 9.93     |

Paired t-test with Holm-Šídák correction

|     | <b>t</b> | <b>df</b> | <b>p value</b> |
|-----|----------|-----------|----------------|
| WT  | 3.161    | 10        | 0.020179       |
| HET | 2.544    | 7         | 0.038447       |
| WT  | 5.723    | 9         | 0.000571       |
| HET | 1.674    | 10        | 0.125092       |
| WT  | 7.071    | 7         | 0.000201       |
| HET | 7.881    | 7         | 0.000201       |
| WT  | 4.812    | 8         | 0.001334       |
| HET | 9.265    | 7         | 0.000071       |
| WT  | 3.823    | 9         | 0.00812        |
| HET | 2.791    | 7         | 0.026867       |
| WT  | 2.807    | 11        | 0.017072       |
| HET | 4.263    | 11        | 0.002672       |

## Social novelty preference

*Seconds in proximity* Means ± SEM

|                        |     | <b>stranger 1</b> | <b>stranger 2</b> |
|------------------------|-----|-------------------|-------------------|
| <b>Control males</b>   | WT  | 68.88 ± 10.20     | 125.45 ± 9.88     |
|                        | HET | 64.55 ± 10.04     | 133.73 ± 17.43    |
| <b>ELSD males</b>      | WT  | 71.78 ± 10.06     | 137.16 ± 14.21    |
|                        | HET | 56.25 ± 8.98      | 167.87 ± 16.85    |
| <b>PASD males</b>      | WT  | 62.48 ± 7.41      | 120.98 ± 14.94    |
|                        | HET | 68.65 ± 10.37     | 95.31 ± 5.22      |
| <b>Control females</b> | WT  | 64.03 ± 10.73     | 123.38 ± 10.09    |
|                        | HET | 98.38 ± 16.17     | 121.80 ± 13.61    |
| <b>ELSD females</b>    | WT  | 64.92 ± 7.41      | 118.66 ± 8.99     |
|                        | HET | 75.29 ± 13.98     | 111.31 ± 9.76     |
| <b>PASD females</b>    | WT  | 69.54 ± 10.67     | 90.07 ± 12.13     |
|                        | HET | 82.92 ± 13.20     | 117.41 ± 18.03    |

Paired t-test with Holm-Šídák correction

|     | <b>t</b> | <b>df</b> | <b>p value</b> |
|-----|----------|-----------|----------------|
| WT  | 4.588    | 10        | 0.001995       |
| HET | 2.663    | 7         | 0.032307       |
| WT  | 3.581    | 9         | 0.005919       |
| HET | 5.955    | 10        | 0.000281       |
| WT  | 3.955    | 7         | 0.010959       |
| HET | 2.003    | 7         | 0.085182       |
| WT  | 3.93     | 8         | 0.008699       |
| HET | 1.057    | 7         | 0.325736       |
| WT  | 5.147    | 9         | 0.001211       |
| HET | 1.677    | 7         | 0.137533       |
| WT  | 1.092    | 11        | 0.298247       |
| HET | 1.781    | 11        | 0.194496       |
