# Supplementary material for: Early life sleep disruption potentiates lasting sex-specific changes in behavior in genetically vulnerable Shank3 heterozygous autism model mice
Source: PubMed Central journal article supplement (PMC9425965; doi:10.1186/s13229-022-00514-5), 2022-08-29

**A males**

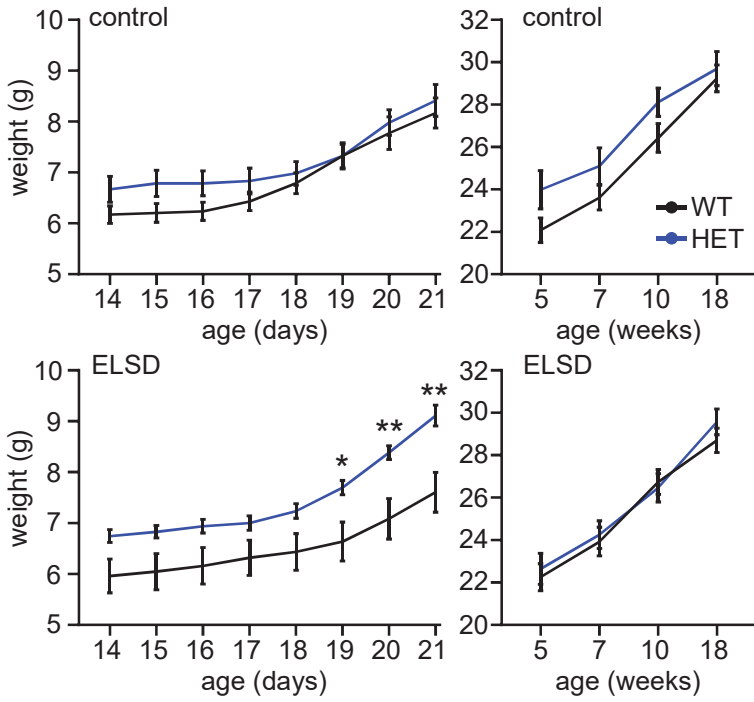

**B females**

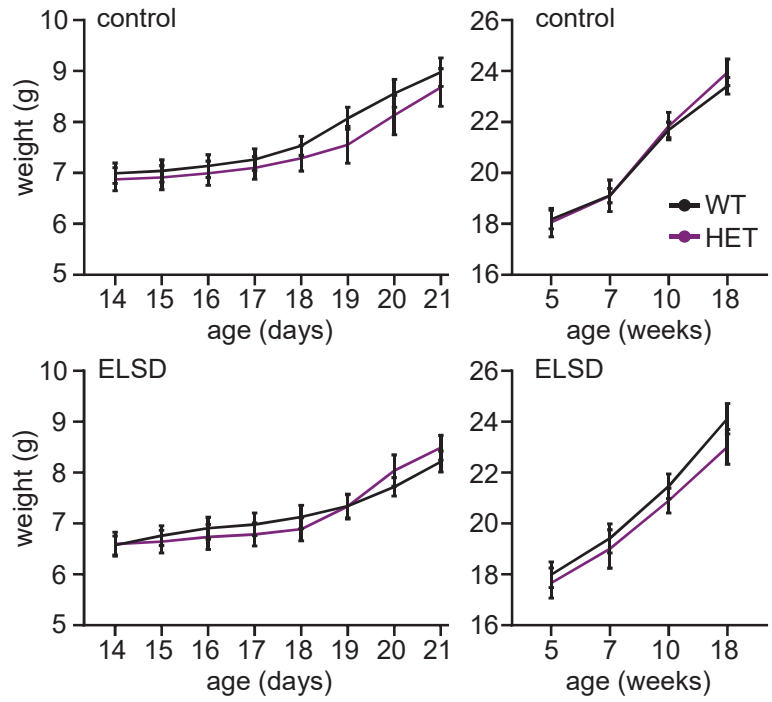

**C**

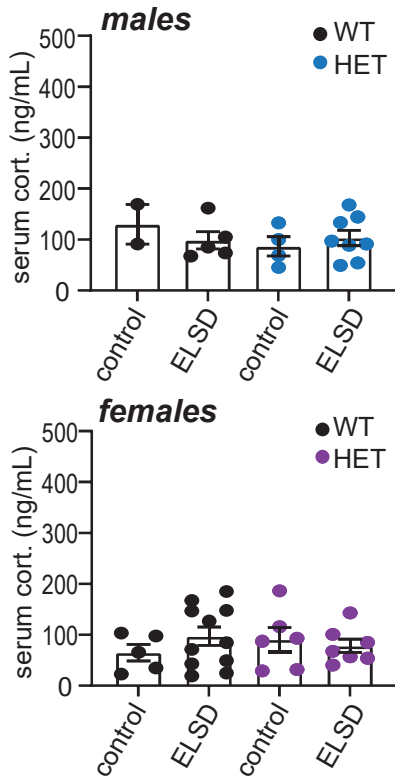

**D**

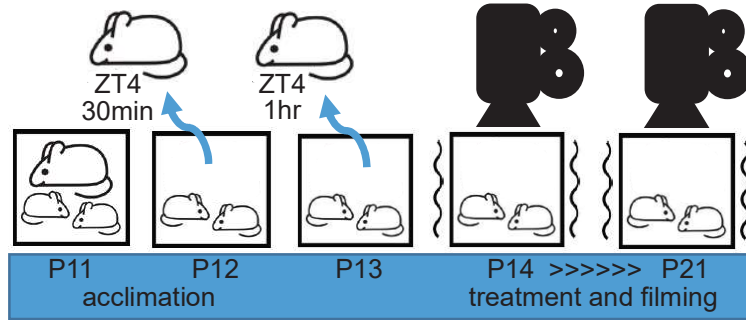

**E**

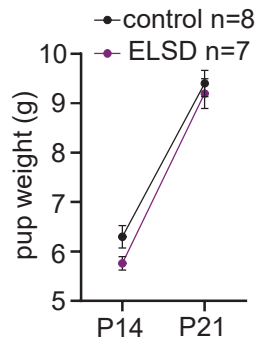

**F**

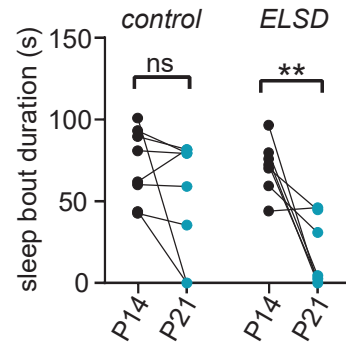

Supplement: 13229_2022_514_MOESM3_ESM.pdf [file 13229_2022_514_MOESM3_ESM.pdf]
