# Supplementary material for: Early life sleep disruption potentiates lasting sex-specific changes in behavior in genetically vulnerable Shank3 heterozygous autism model mice
Source: PubMed Central journal article supplement (PMC9425965; doi:10.1186/s13229-022-00514-5), 2022-08-29

Additional File 4

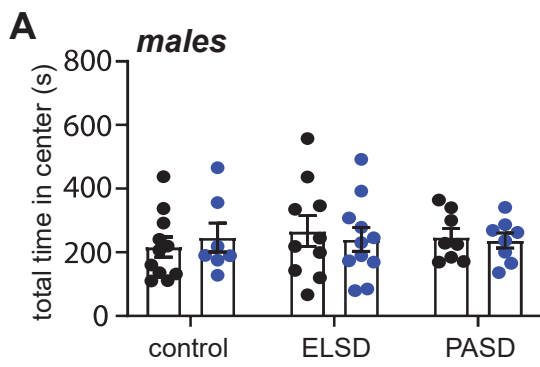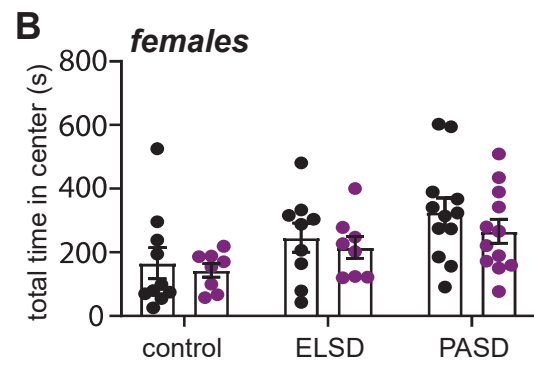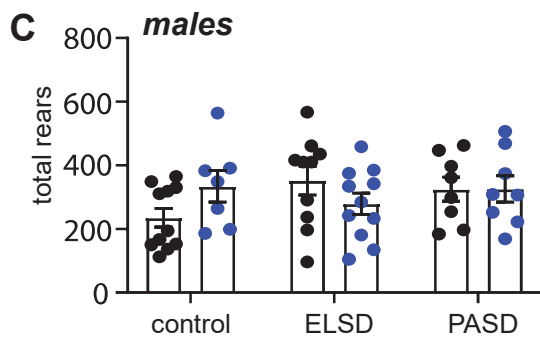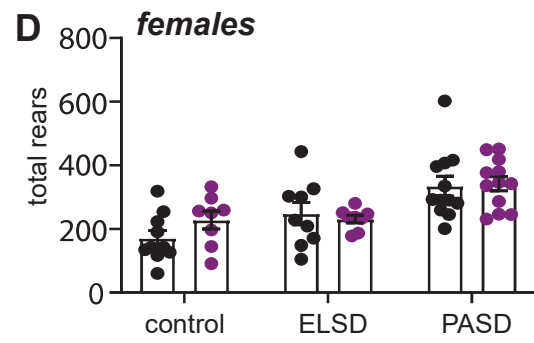

Supplement: 13229_2022_514_MOESM4_ESM.pdf [file 13229_2022_514_MOESM4_ESM.pdf]
